# Supplementary material for: Facile synthesis and photoluminescence spectroscopy of 3D-triangular GaN nano prism islands
Source: Royal Society of Chemistry journal article supplement (doi:10.1039/c4dt01191k), 2014-01-01
Supplement: c4dt01191k1.pdf [file c4dt01191k1.pdf]

†  
**Electronic Supplementary Information (ESI)**

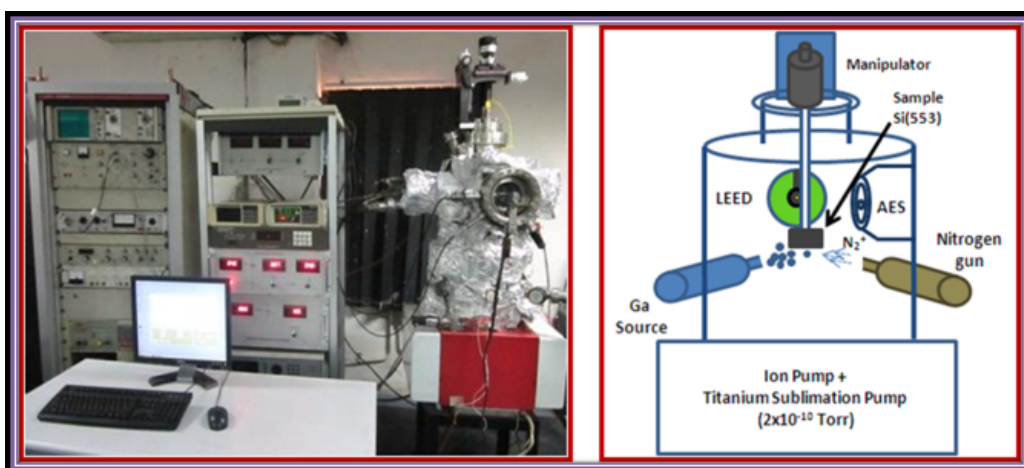

**Figure S1** Actual growth system for TGNPI nanostructures which is equipped with Auger Electron Spectroscopy, Low Energy Electron Diffraction, Ga source and Low energy nitrogen gun.

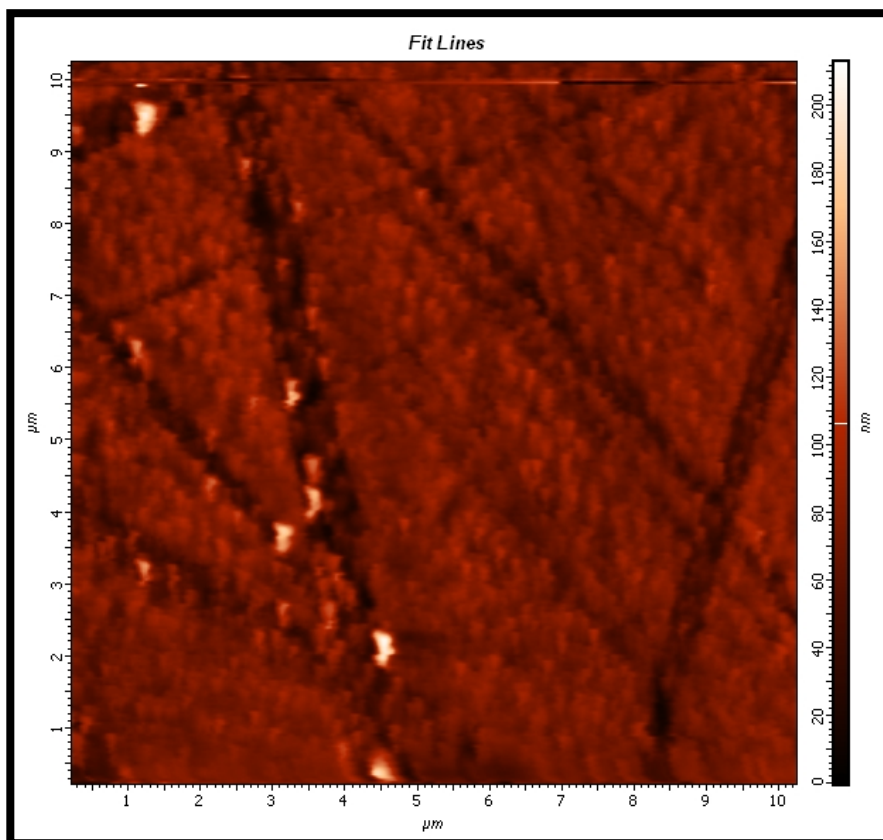

**Figure S2:** Low resolution AFM image of TGNPI structure grown at 600 °C.

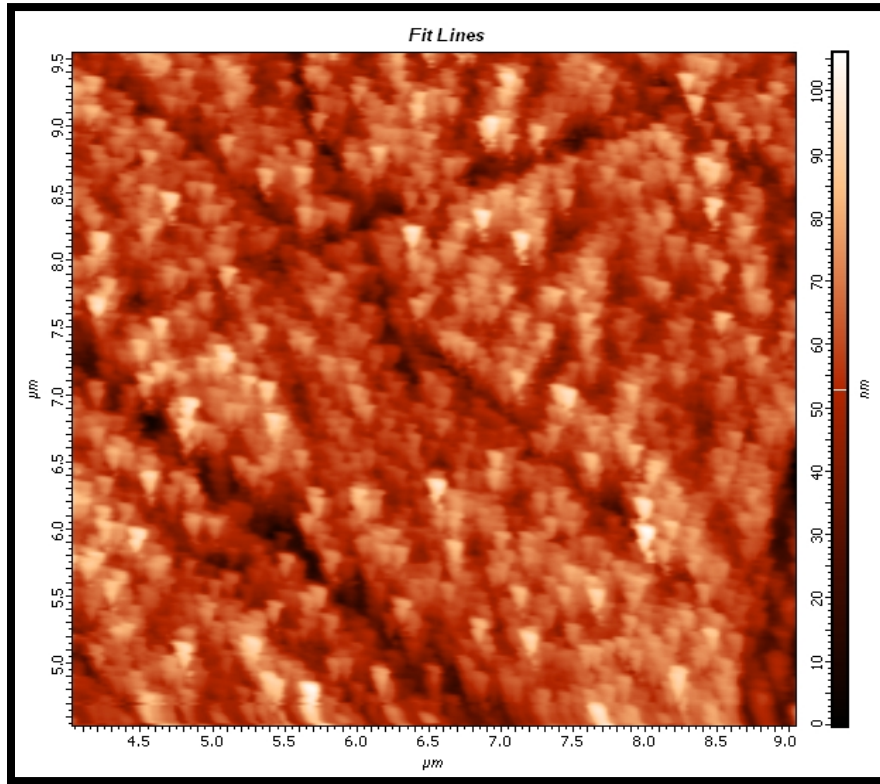

**Figure S3:** AFM image of TGNPI structure grown at 600 °C.

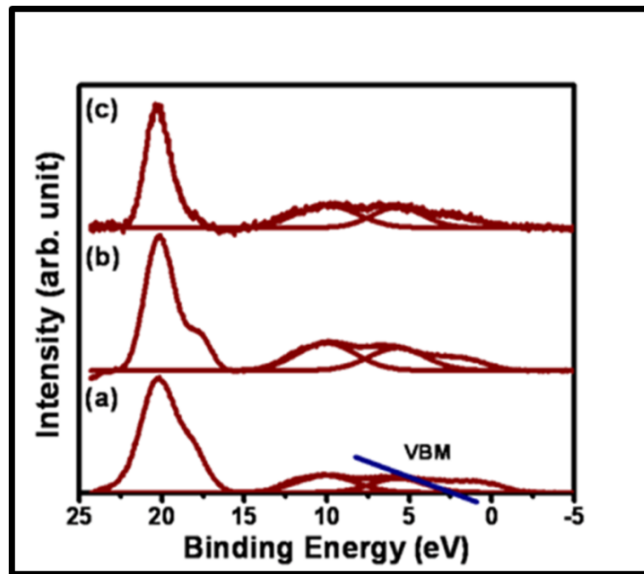

**Figure S4:** Deconvoluted Valence band spectra of GaN/Si(553) surface using 2keV nitrogen ions at various temperatures (with hybrid Ga and N contribution , N-p derivative) (a) RT (57,43), (b) 450°C (56, 44), (c) 600°C (52, 48).

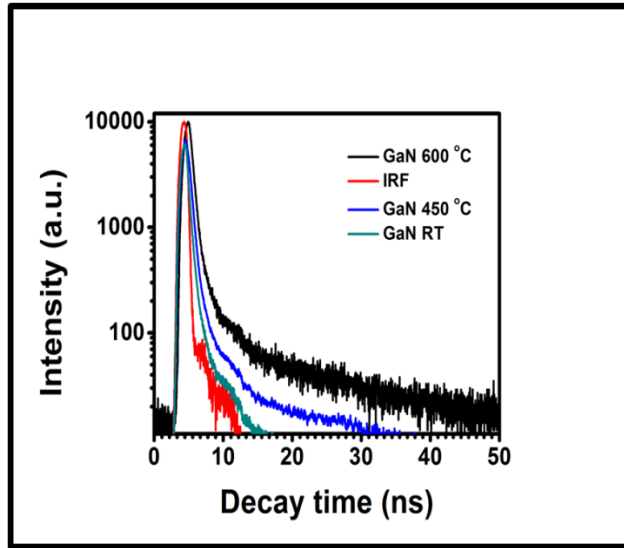

**Figure S5:** Represents decay profile of samples grown at RT, 450 and 600°C.
